# Supplementary material for: Supramolecular gel from self-assembly of a C3-symmetrical discotic molecular bearing pillar[5]arene
Source: Royal Society of Chemistry journal article supplement (doi:10.1039/c7sm00642j), 2017-01-01
Supplement: c7sm00642j1.pdf [file c7sm00642j1.pdf]

## Electronic Supplementary Material

# Supramolecular Gel from Self-assembly of a $C_3$ -Symmetrical Discotic Molecular Bearing Pillar[5]arene

Xiaojun Kuang, Ali Wajahat, Wei-tao Gong\*, Manivannan Kalavathi Dhinakaran, Xiaohan Li,  
Gui-ling Ning

State Key Laboratory of Fine Chemicals, School of Chemical Engineering, School of Chemistry,  
Dalian University of Technology, Dalian 116024, P. R. China.

wtgong@dlut.edu.cn

### Table of Contents

|         |                                                                                   |   |
|---------|-----------------------------------------------------------------------------------|---|
| Fig. S1 | $^1\text{H}$ NMR, $^{13}\text{C}$ NMR and MALDI-TOF MS Spectra of <b>2b</b> ----- | 3 |
| Fig. S2 | $^1\text{H}$ NMR, $^{13}\text{C}$ NMR and MALDI-TOF MS Spectra of <b>2a</b> ----- | 5 |
| Tab. S1 | CGC and Tg of <b>2b</b> -gels-----                                                | 6 |
| Fig. S3 | Image of gel ( <b>2a</b> )-----                                                   | 6 |
| Fig. S4 | Strain sweep rheological measurement for gels of <b>2b</b> -acetonitrile -----    | 6 |
| Fig. S5 | Lowest energy structure of compound <b>2b</b> -----                               | 7 |

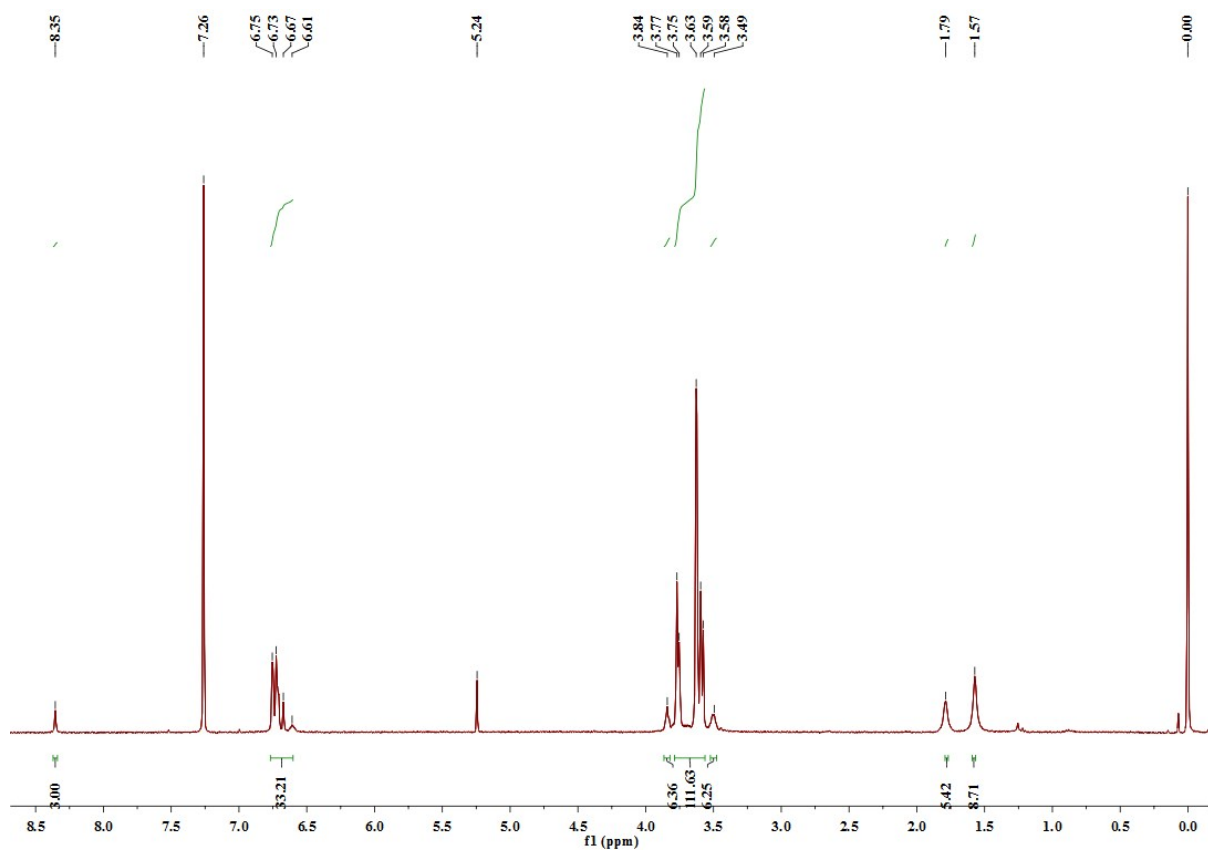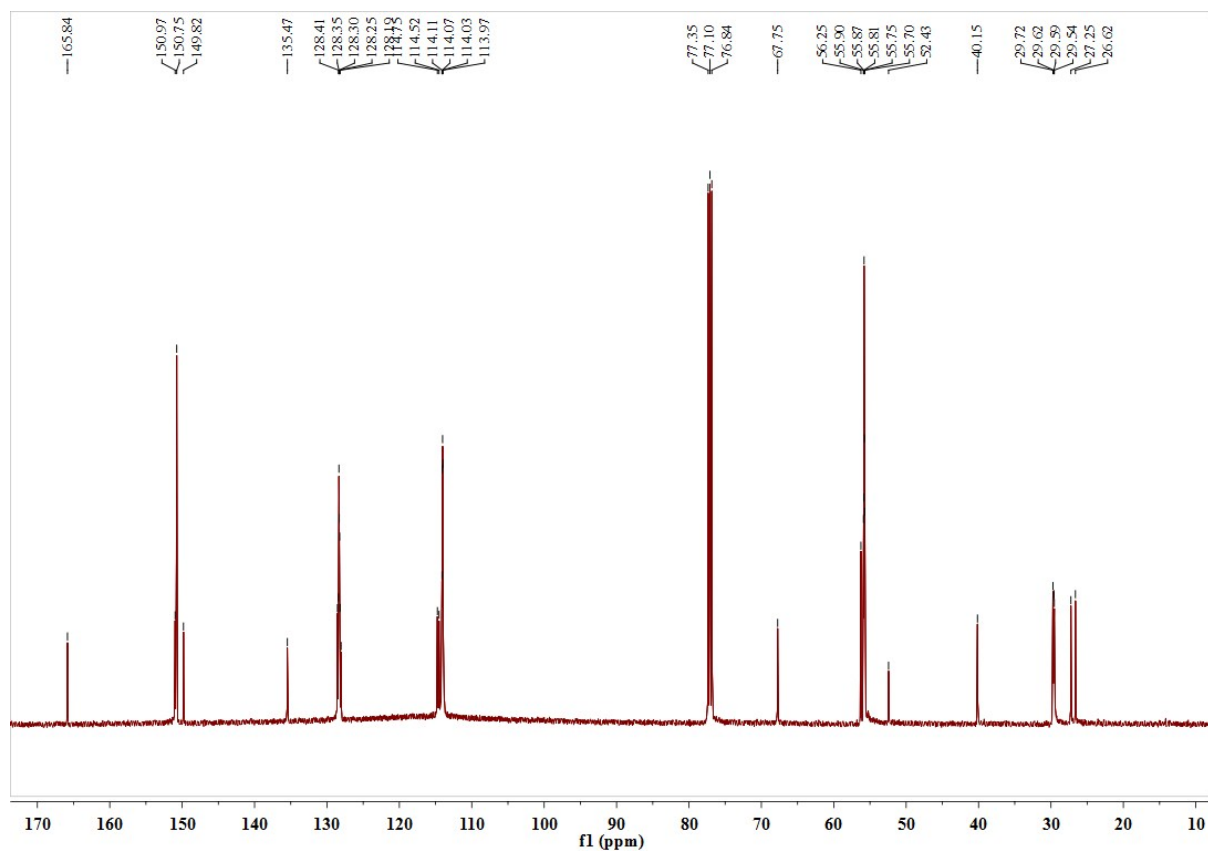

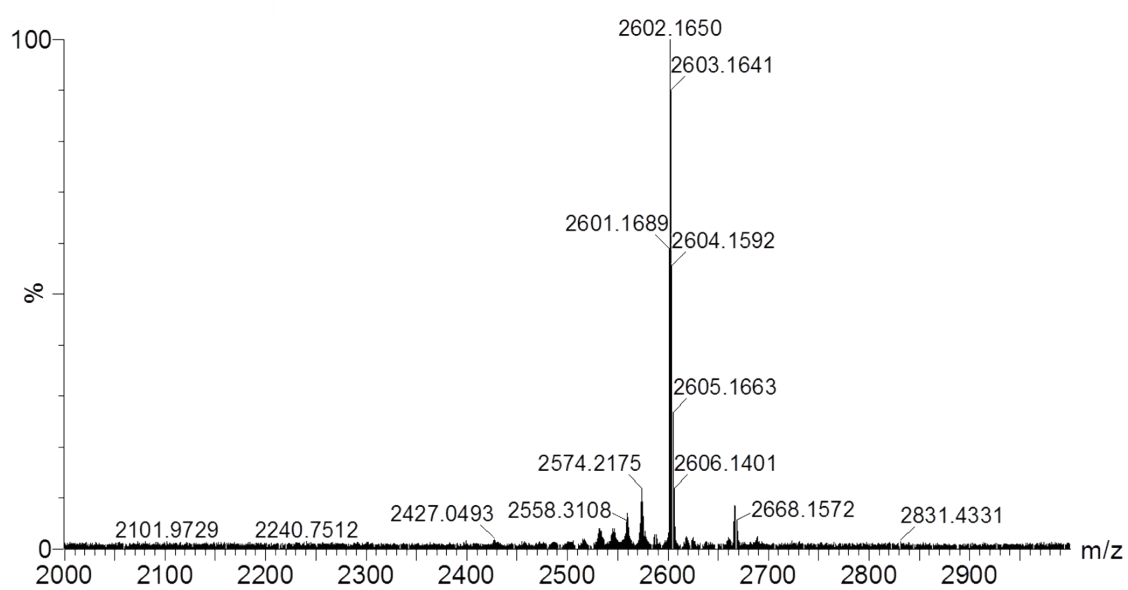

**Fig. S1**  $^1\text{H}$ -NMR spectrum (400MHz,  $\text{CDCl}_3$ , room temperature),  $^{13}\text{C}$ -NMR (126MHz,  $\text{CDCl}_3$ , room temperature) and MALDI-TOF MS of **2b**

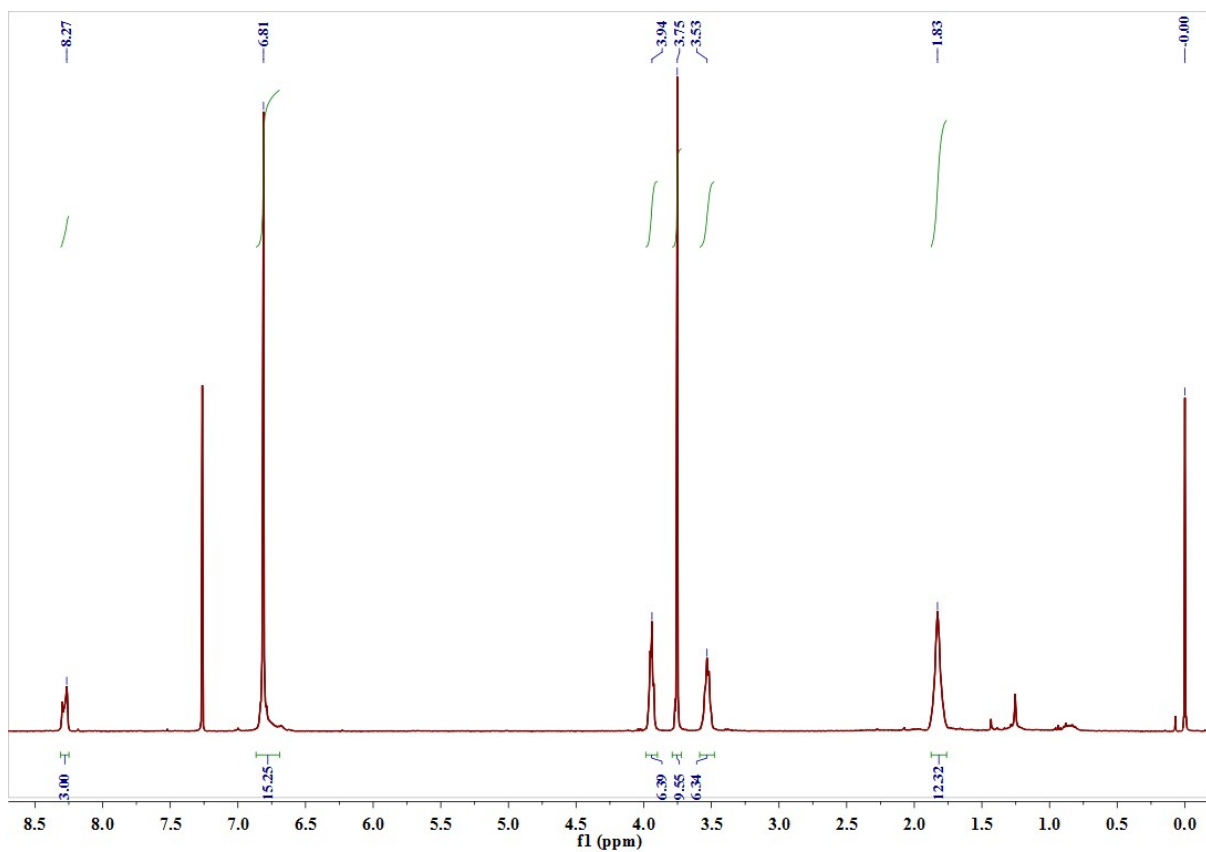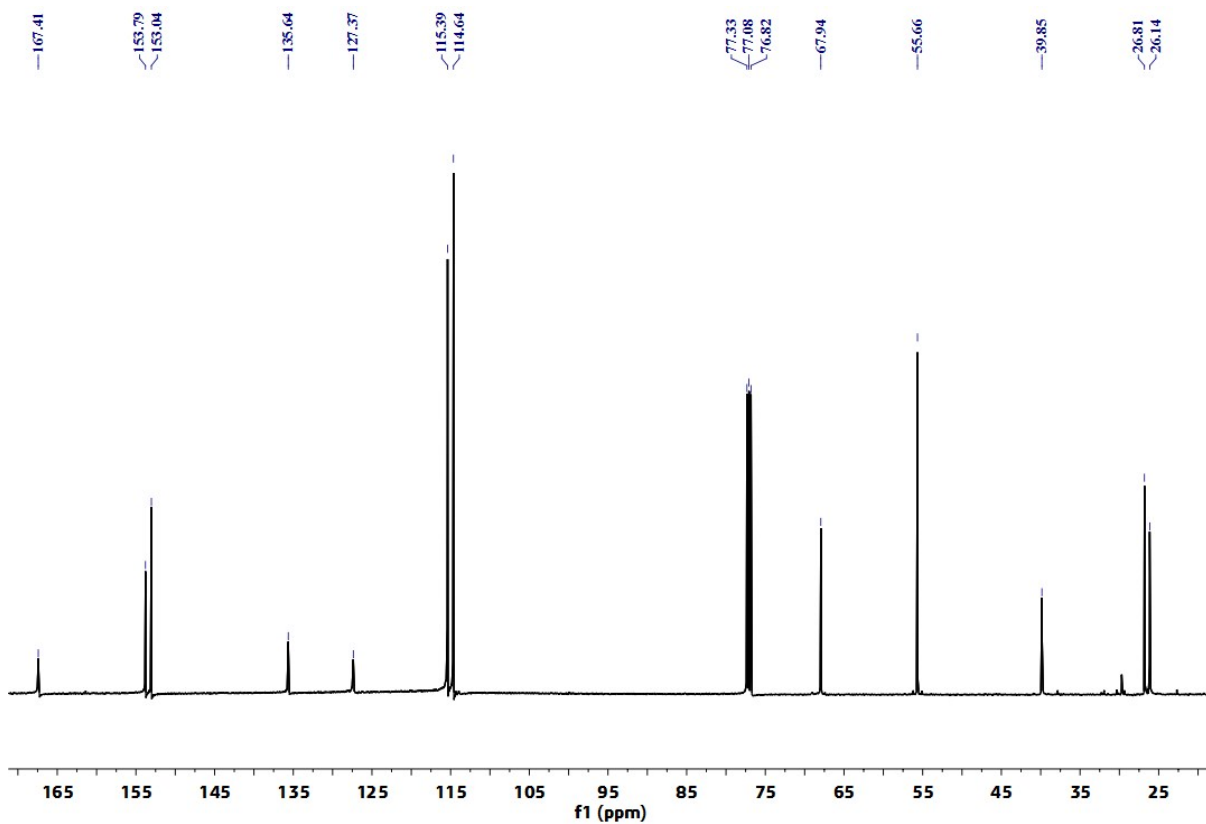

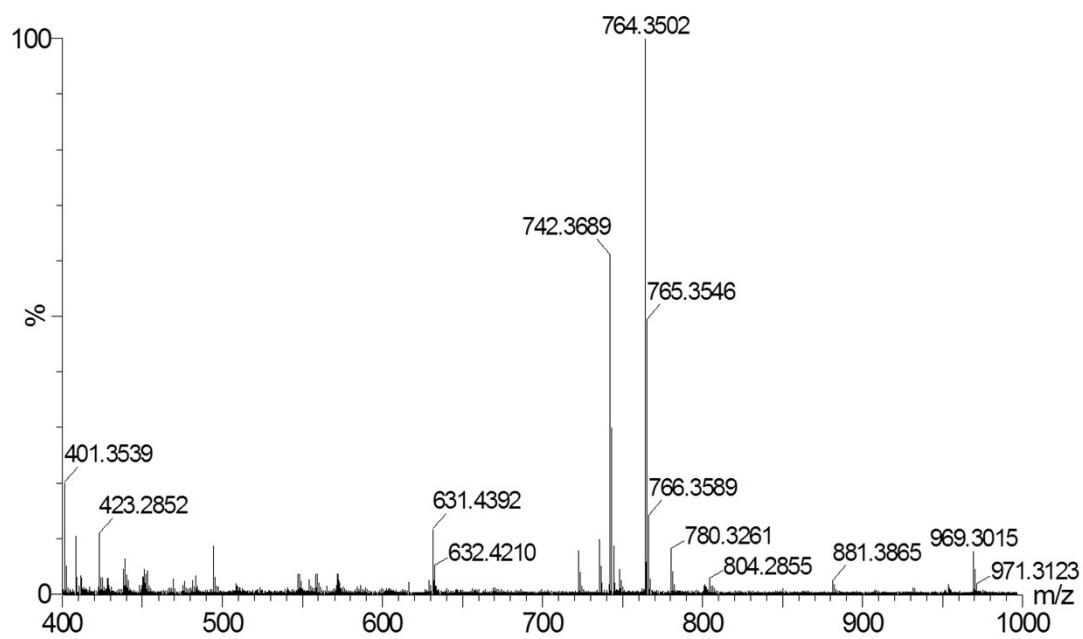

**Fig. S2**  $^1\text{H}$ -NMR spectrum (400MHz,  $\text{CDCl}_3$ , room temperature),  $^{13}\text{C}$ -NMR (126MHz,  $\text{CDCl}_3$ , room temperature) and MALDI-TOF MS of **2a**

**Tab. S1** CGC and Tg of gels

| Solvent      | CGC (wt%, w/v) | Tg <sup>a</sup> (°C) |
|--------------|----------------|----------------------|
| Acetonitrile | 0.2            | 63                   |
| 1-Propanol   | 2              | 49                   |
| Ethanol      | 2              | 38                   |

a: All the Tg are tested under the gel that formed in its CGC

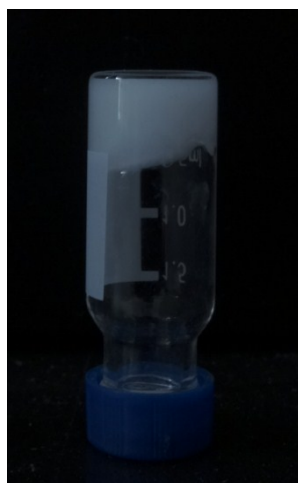

**Fig. S3** Image of gel (2a)

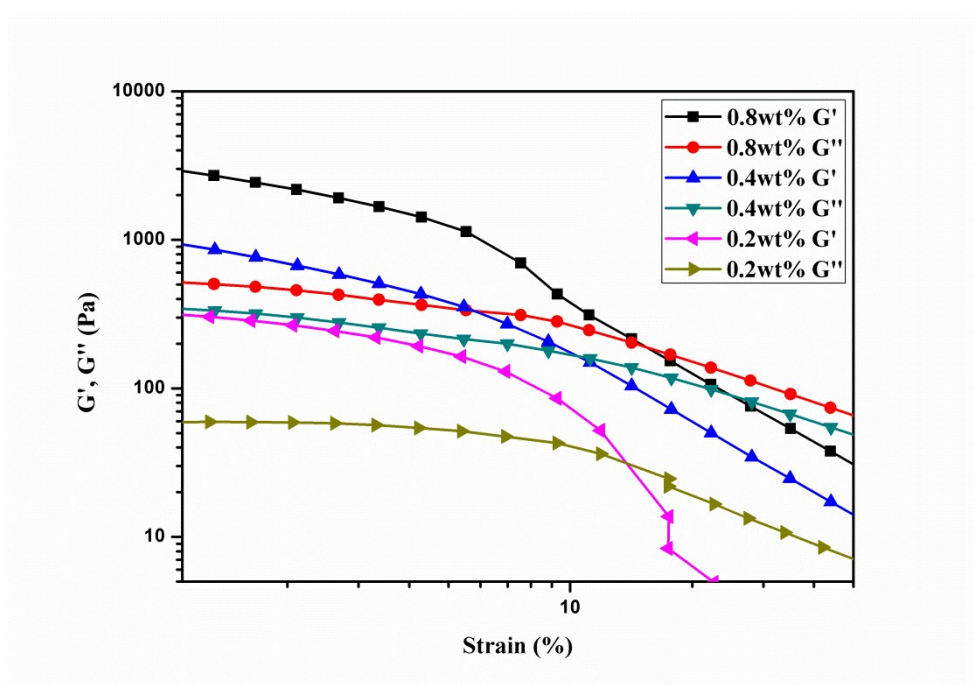

**Fig. S4** Strain sweep rheological measurement for gels of **2b**-acetonitrile in different concentration at a constant frequency of 1.0 Hz at 25°C.

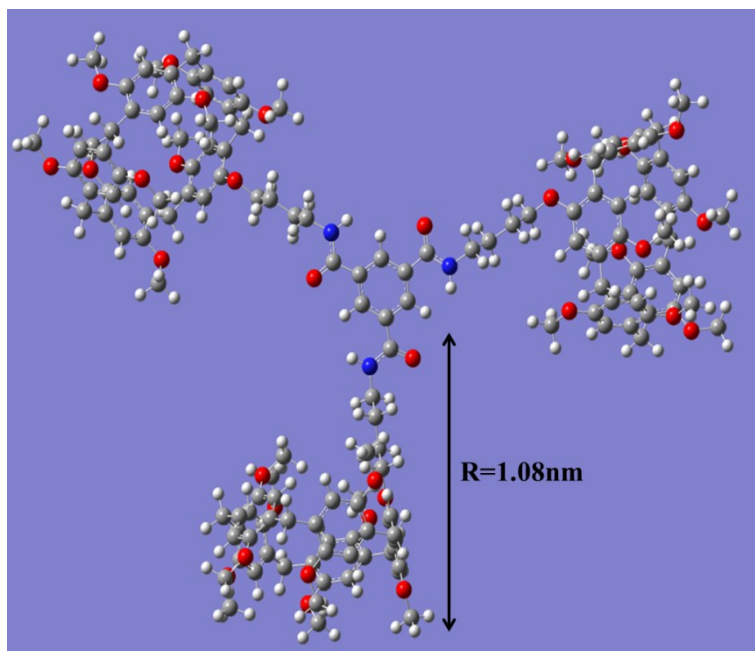

**Fig. S5** Lowest energy structure of compound **2b**
